# Supplementary material for: Acanthopanax senticosus Polysaccharide Enhances the Pathogen Resistance of Radiation-Damaged Caenorhabditis elegans through Intestinal p38 MAPK-SKN-1/ATF-7 Pathway and Stress Response
Source: MDPI journal article supplement (doi:10.3390/ijms23095034), 2022-05-01
Supplement: s1 [file s1]

**Table S1: The primers**

| <b>Genes</b>   | <b>Forward primer sequence</b> | <b>Reverse primer sequence</b> |
|----------------|--------------------------------|--------------------------------|
| <i>act-1</i>   | ACGACGAGTCCGGCCCATCC           | GAAAGCTGGTGGTGACGATGGTT        |
| <i>tba-1</i>   | TCAACACTGCCATCGCCGCC           | TCCAAGCGAGACCAGGCTTCAG         |
| <i>irg-1</i>   | AAGCAGCATGCGTATTTTCA           | GCAGCTTCTCCTTTTCTCC            |
| <i>hsf-1</i>   | CAGCCAACAGGGAATCAAAT           | TGCTGCTCCAGAACTGAAA            |
| <i>C29F3.7</i> | GATCGGCAACTTTACCTCCA           | AATTGTGGCGGATATTCTGG           |
| <i>lys-1</i>   | TTCGGATCTTTCAAGAAGGC           | GGGATTCCAACAACGTAAA            |
| <i>spp-1</i>   | TGAACATCGGAACTCTTTGC           | TCAGCTCTTCCTCACACTCG           |
| <i>abf-1</i>   | TGCCTTCTCCTTGTTCTCCT           | ATCCTCTGCATTACCGGAAC           |
| <i>pmk-1</i>   | CGACTCCACGAGAAGGAT             | ATATGTACGACGGGCATG             |
| <i>sek-1</i>   | TGCTCAACGAGCTAGACG             | ATGTTCGACGGTTTCACG             |
| <i>nsy-1</i>   | TGCGATGAACTACTACGG             | CACCCAAATGACCAAATA             |
| <i>skn-1</i>   | AGGCTCAACCTCAGAACATG           | TACGAGTAGGCGGTCATTTT           |
| <i>atf-7</i>   | CTGGAGAACTTGACGTGGCA           | ATCCGACATTGTTCCGGCAT           |
| <i>ctl-1</i>   | GAATGTGAAGAATTATTTGCTGA        | AACTCGATTCTTGGGACGAT           |
| <i>ctl-2</i>   | CAAGGAACTACTTCGCTGAGG          | AATGAGTGTCGGTGTACGAGAA         |
| <i>ctl-3</i>   | GAATGTGAAGAATTATTTGCTGA        | AACTCGATTCTTGGGACGAT           |
| <i>gst-4</i>   | GATACTTGGCAAGAAAATTTGGAC       | TTGATCTACAATTGAATCAGCGTAA      |
| <i>gst-5</i>   | GCCAGCATTGAAAGAAACCT           | TTTTTCCGTTGAGCTTGAAC           |
| <i>gst-9</i>   | CAAGAATTTATTGATGAGCGTATTTCT    | ACTTGTCCAAATGGGGTCATA          |
| <i>gst-10</i>  | ACTGGAGCAATTATGCGTCA           | CTCCCTCGAAGAACATGTCTG          |
| <i>sod-1</i>   | ACGCTCGTCACGCTTTAC             | TCTTCTGCCTTGTCTCCG             |
| <i>sod-2</i>   | GGCATCAACTGTCGCTGT             | ACAAGTCCAGTTGTTGCC             |
| <i>sod-3</i>   | TGACATCACTATTGCGGT             | GGGACCATTCTTCCAAA              |
| <i>sod-4</i>   | CACCAGATGACTCGAACA             | AATGAGGCAAGAGAGTCG             |

**Table S2: Mean survival time of nematodes under PA14 infection**

| Figure  | strains      | treatments                   | mean survival time (h) | P value (vs radiation group) |
|---------|--------------|------------------------------|------------------------|------------------------------|
| Fig1. a | N2           | control                      | 82.44±2.16             | **                           |
|         |              | radiation                    | 58.20±2.22             |                              |
|         |              | radiation+0.1mg/mL ASPS      | 70.32±2.51             | **                           |
|         |              | radiation+0.5mg/mL ASPS      | 72.00±2.59             | **                           |
|         |              | radiation+1mg/mL ASPS        | 75.00±2.57             | **                           |
|         |              | radiation+2mg/mL ASPS        | 70.65±2.32             | **                           |
| Fig1. b | N2           | control                      | 82.15±2.13             | **                           |
|         |              | radiation                    | 57.12±2.18             |                              |
|         |              | radiation+0.1mg/mL Flavone   | 59.22±2.10             |                              |
|         |              | radiation+0.5mg/mL Flavone   | 60.56±2.05             |                              |
|         |              | radiation+1mg/mL Flavone     | 59.72±2.07             |                              |
| Fig1. c | N2           | control                      | 82.79±2.62             | **                           |
|         |              | radiation                    | 58.34±2.43             |                              |
|         |              | radiation+0.05mg/mL Syringin | 58.96±2.10             |                              |
|         |              | radiation+0.1mg/mL Syringin  | 59.87±2.08             |                              |
|         |              | radiation+0.5mg/mL Syringin  | 59.63±2.21             |                              |
| Fig1. d | N2           | control                      | 81.94±2.16             | **                           |
|         |              | radiation                    | 58.34±2.51             |                              |
|         |              | radiation+0.05mg/mL SaponinE | 59.13±2.31             |                              |
|         |              | radiation+0.1mg/mL SaponinE  | 60.47±2.26             |                              |
|         |              | radiation+0.5mg/mL SaponinE  | 59.78±2.34             |                              |
| Fig4. a | N2           | control                      | 82.44±2.16             | **                           |
|         |              | radiation                    | 58.20±2.22             |                              |
|         |              | radiation+1mg/mL ASPS        | 75.32±2.51             | **                           |
| Fig4. b | <i>pmk-1</i> | control                      | 54.00±1.69             | **                           |
|         |              | radiation                    | 33.00±1.19             |                              |
|         |              | radiation+1mg/mL ASPS        | 35.40±1.28             |                              |
| Fig4. c | <i>nsy-1</i> | control                      | 54.36±1.71             | **                           |
|         |              | radiation                    | 34.48±1.25             |                              |
|         |              | radiation+1mg/mL ASPS        | 35.20±1.34             |                              |

|         |                               |                       |            |    |
|---------|-------------------------------|-----------------------|------------|----|
| Fig4. d | <i>sek-1</i>                  | control               | 53.72±1.22 | ** |
|         |                               | radiation             | 34.63±1.07 |    |
|         |                               | radiation+1mg/mL ASPS | 35.09±1.31 |    |
| Fig5. a | <i>pmk-1Is(Pges-1-pmk-1)</i>  | control               | 80.03±2.08 | ** |
|         |                               | radiation             | 57.31±2.17 |    |
|         |                               | radiation+1mg/mL ASPS | 74.38±2.3  | ** |
| Fig5. b | <i>pmk-1Is(Punc-14-pmk-1)</i> | control               | 54.87±1.16 | ** |
|         |                               | radiation             | 34.93±1.09 |    |
|         |                               | radiation+1mg/mL ASPS | 35.62±1.27 |    |
| Fig6. a | <i>skn-1</i>                  | control               | 64.83±1.34 | ** |
|         |                               | radiation             | 41.35±1.23 |    |
|         |                               | radiation+1mg/mL ASPS | 45.40±1.34 |    |
| Fig6. b | <i>atf-7</i>                  | control               | 53.89±1.33 | ** |
|         |                               | radiation             | 33.63±1.09 |    |
|         |                               | radiation+1mg/mL ASPS | 35.07±1.21 |    |

---

\*\*p<0.01 (log-rank test)
